# Supplementary material
Source: MDPI journal article supplement (https://www.mdpi.com/2075-4442/9/8/78)
Supplement: s1 [file s1]

Archive with 1 entries (1 files):
- lubricants-1283999-supplementary.pdf
